# Supplementary material
Source: publisher figshare collection journal article supplement (https://acs.figshare.com/ndownloader/files/21792720)
Supplement: Supplementary file 1 [file 21792720]

# Supporting Information

**Table captions:**

Table S1. Molecular weight of diblock copolymers synthesized with different PCL/mPEG ratio.

Table S2. Kinetic analysis of drug release

Table S3. HPLC method validation in rat plasma and brain

**Figure caption:**

Fig. S1. Particle size distributions of the optimized Riv-NPs measured by Dynamic light scattering

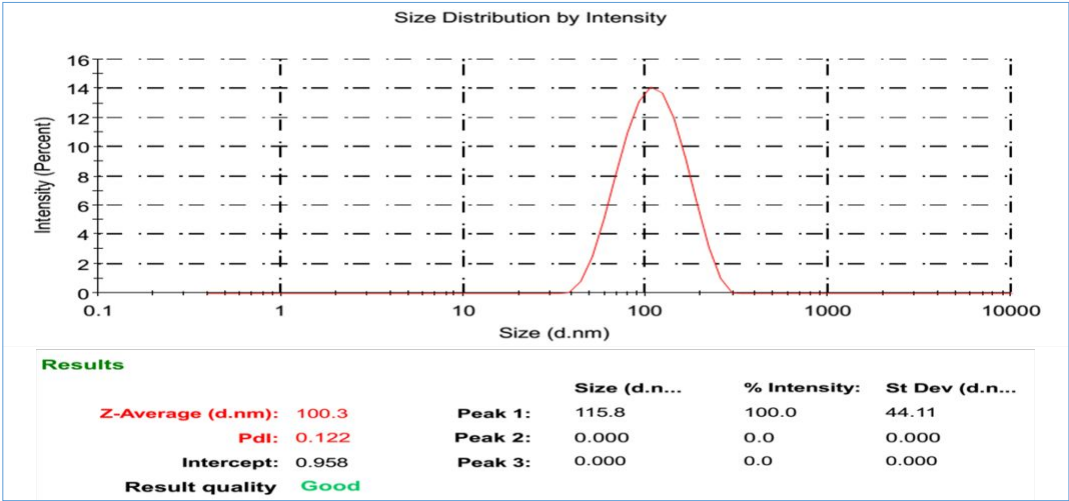

Fig. S1. Particle size distributions of the optimized Riv-NPs measured by Dynamic light scattering

*Table S1. Molecular weight of diblock copolymers synthesized with different PCL/mPEG ratio.*

| Polymer code | feeding ratio<br>( $\epsilon$ -CL / M-PEG ,<br>w/w) | Mn <sub>PEG</sub> | DP <sub>PCL</sub> | Mn <sub>PCL</sub> | Mn <sub>PCL</sub> /<br>Mn <sub>PEG</sub> | Copolymer<br>Mn (Da) |
|--------------|-----------------------------------------------------|-------------------|-------------------|-------------------|------------------------------------------|----------------------|
| Pol 1        | 1                                                   | 5000              | 37.7              | 4525              | 0.9                                      | <b>9525</b>          |
| Pol 2        | 2                                                   | 5000              | 89.3              | 10722             | 2.1                                      | <b>15721</b>         |
| Pol 3        | 3                                                   | 5000              | 130.5             | 15661             | 3.1                                      | <b>20660</b>         |
| Pol 4        | 5                                                   | 5000              | 196.9             | 23625             | 4.7                                      | <b>28625</b>         |

*Table S2. Kinetic analysis of drug release*

| Goodness<br>of fit | Zero-<br>order | First-order | Higuchi | Korsmeyer-<br>Peppas | Hixson-<br>Crowell | Weibull |
|--------------------|----------------|-------------|---------|----------------------|--------------------|---------|
| <b>Rsqr_adj</b>    | -1.457         | 0.974       | 0.465   | 0.864                | 0.475              | 0.996   |
| <b>AIC</b>         | 123.27         | 68.62       | 104.97  | 89.42                | 104.74             | 45.58   |
| <b>MSC</b>         | -1.07          | 3.49        | 0.46    | 1.76                 | 0.48               | 5.41    |

Table S3. HPLC method validation in rat plasma and brain

|               | Quality control | Nominal concentration (ug/ml) | day | Intra-day (n=3) |              | Inter-day (n=9) |              |
|---------------|-----------------|-------------------------------|-----|-----------------|--------------|-----------------|--------------|
|               |                 |                               |     | RSD (%)         | Accuracy (%) | RSD (%)         | Accuracy (%) |
| <b>plasma</b> | LQC             | 0.08                          | 1   | 6.5             | 111.6        | 11.1            | 102.4        |
|               |                 |                               | 2   | 11.5            | 98.1         |                 |              |
|               |                 |                               | 3   | 12.3            | 97.5         |                 |              |
|               | MQC             | 1                             | 1   | 5.4             | 100.7        | 5.6             | 102.2        |
|               |                 |                               | 2   | 4.3             | 98.9         |                 |              |
|               |                 |                               | 3   | 4.8             | 107.1        |                 |              |
|               | HQC             | 3                             | 1   | 3.1             | 103.2        | 5.9             | 99.5         |
|               |                 |                               | 2   | 4.0             | 102.6        |                 |              |
|               |                 |                               | 3   | 1.8             | 92.6         |                 |              |
| <b>brain</b>  | LQC             | 0.1                           | 1   | 8.6             | 106.8        | 8.1             | 107.0        |
|               |                 |                               | 2   | 4.7             | 110.9        |                 |              |
|               |                 |                               | 3   | 11.5            | 103.2        |                 |              |
|               | MQC             | 1                             | 1   | 3.6             | 107.4        | 7.9             | 101.2        |
|               |                 |                               | 2   | 7.7             | 95.8         |                 |              |
|               |                 |                               | 3   | 9.3             | 100.4        |                 |              |
|               | HQC             | 3                             | 1   | 2.9             | 99.3         | 3.5             | 100.9        |
|               |                 |                               | 2   | 5.4             | 101.4        |                 |              |
|               |                 |                               | 3   | 2.3             | 102.1        |                 |              |
